# Supplementary material
Source: Springer Nature journal article supplement (https://www.springermedizin.de/resource/supplementary/12943_2014_1496_MOESM10_ESM.pdf/9553028)
Supplement: MOESM10 [file 9553028]

| <b>Chromosome localisation</b> | <b>Genes localized in bi-allelic deleted regions</b>                                                                                                                                                                                        |
|--------------------------------|---------------------------------------------------------------------------------------------------------------------------------------------------------------------------------------------------------------------------------------------|
| 1                              | AGBL4 (2), AHDC1, AMY1A, AMY2A, AMY1B, AMY2B, AMY1C, C1orf174, <b>CEP104</b> , <b>DDFB</b> , FAM76A, <b>FGR</b> , <b>IFI6</b> , RNPC3, STX12, WASF2                                                                                         |
| 2                              | LRP1B (3)                                                                                                                                                                                                                                   |
| 3                              | <b>FAM86D</b> , <b>FRG2C</b> , <b>LMLN</b>                                                                                                                                                                                                  |
| 6                              | AGER, AGPAT1, ATF6B, BTNL24B, CREBL1, CYP21A2, CHCG4P6, EGFL8, <b>FKBPL</b> , HCG2P7, HLA-DQA1 (3), HLA-DQA2, HLA-DQB1 (3), HLA-DQB2, HLA-DRA, HLA-DRB1 (3), HLA-DRB5 (6), HLA-H, GPSM3, NOTCH4, PBX2, PPT2, PRRT1, RAGE, RNF5, STK19, TNXB |
| 8                              | ADAM5P (6), ADAM3A (6)                                                                                                                                                                                                                      |
| 9                              | <b>CDKN2A</b> (4), <b>CDKN2B</b> (3), DMRTA1, FNBPI, MTAP, <b>TUSC1</b>                                                                                                                                                                     |
| 10                             | <b>PTEN</b>                                                                                                                                                                                                                                 |
| 11                             | ELP4 (2)                                                                                                                                                                                                                                    |
| 14                             | <b>BAZ1A</b> , FAM177A1, IGBP1P1, PPP2R5E (2), PPP2R3C, SGPP1 (2), SRP54, WDR89 (2)                                                                                                                                                         |
| 15                             | A26B1 (2), GOLGA8A, PWRN2                                                                                                                                                                                                                   |
| 22                             | CRYBB2, IGLL3, LRP5L                                                                                                                                                                                                                        |
| <b>Chromosome localisation</b> | <b>Genes localized in amplified regions</b>                                                                                                                                                                                                 |
| 4                              | ANAPC4, CCDC149, CCKAR, LGI2, LOC389203, PCDH7, PI4K2B, RBPJ, SEPSECS, SLC34A2, SOD3, STIM2, TBC1D19, ZCCHC4                                                                                                                                |
| 5                              | <b>FGF10</b>                                                                                                                                                                                                                                |
| 7                              | ZNF680                                                                                                                                                                                                                                      |
| 8                              | ADAM3A, ADAM2                                                                                                                                                                                                                               |
| 11                             | JRKL, CNTN5, TRIM48                                                                                                                                                                                                                         |
| 19                             | LOC642290                                                                                                                                                                                                                                   |
